# Supplementary material for: CircPTPRA acts as a tumor suppressor in bladder cancer by sponging miR-636 and upregulating KLF9
Source: publisher site journal article supplement (doi:10.18632/aging.102530), 2019-12-10
Supplement: Supplementary file [file aging-v11i23-102530-supplementary-material-SD1.pdf]

## SUPPLEMENTARY TABLE

**Supplementary Table 1. The sequences of primers, oligonucleotides and probes used in this study.**

| <b>Primers</b>          |                                          |
|-------------------------|------------------------------------------|
| CircPTPRA Forward       | TAACCAGTTCACGGATGCCA                     |
| CircPTPRA Reverse       | AGCATTGTTGGCACTGACAC                     |
| Linear PTPRA Forward    | ACCAGGGAGAATAAGAGCCG                     |
| Linear PTPRA Reverse    | GATCATGCCCTTTCCGTCAC                     |
| GAPDH Forward           | CAAGGCTGAGAACGGGAAG                      |
| GAPDH Reverse           | TGAAGACGCCAGTGGACTC                      |
| Divergent GAPDH Forward | GAAGGTGAAGGTCGAGTC                       |
| Divergent GAPDH Reverse | GAAGATGGTGATGGGATTTT                     |
| hsa-miR-636 Forward     | ACACTCCAGCTGGGTGTGCTTGCTCGTCCCG          |
| hsa-miR-1250-5p Forward | ACACTCCAGCTGGGACGGTGCTGGATGTG            |
| hsa-miR-578 Forward     | ACACTCCAGCTGGGCTTCTTGTGCTCTAG            |
| miRNA reverse primer    | TGGTGTGCTGGAGTCG                         |
| U6 Forward              | CTCGCTTCGGCAGCACA                        |
| U6 Reverse              | AACGCTTCACGAATTTGCGT                     |
| 18S Forward             | GGAGTATGGTTGCAAAGCTGA                    |
| 18S Reverse             | TCCTGCTTTGGGGTTCGATT                     |
| <b>oligonucleotides</b> |                                          |
| Si-NC sense             | UUCUCCGAACGUGUCACGUTT                    |
| Si-NC antisense         | ACGUGACACGUUCGGAGAATT                    |
| CircPTPRA-si1 sense     | CCCUCUUCAGAUAAAGCAUTT                    |
| CircPTPRA-si1 antisense | AUGCUUAUCUGAAGGAGGGTT                    |
| CircPTPRA-si2 sense     | CUUCAGAUAAAGCAUGGAUUTT                   |
| CircPTPRA-si2 antisense | AAUCCAUGCUUAUCUGAAGTT                    |
| mimic-NC sense          | UUCUCCGAACGUGUCACGUTT                    |
| mimic-NC antisense      | ACGUGACACGUUCGGAGAATT                    |
| miR-636 mimic sense     | UGUGCUUGCUCGUCCCCGCCGCA                  |
| miR-636 mimic antisense | UGCGGGCGGGACGAGCAAGCACA                  |
| Inhibitor-NC            | CAGUACUUUUGUGUAGUACAA                    |
| miR-636 inhibitor       | UGCGGGCGGGACGAGCAAGCACA                  |
| KLF9-si1 sense          | GCAUGAUCAAGCGAUCGAATT                    |
| KLF9-si1 antisense      | UUCGAUCGCUUGAUC AUGCTT                   |
| KLF9-si2 sense          | CUCUCUUGAAUCACGUUAATT                    |
| KLF9-si2 antisense      | UUAACGUGAUUCAAGAGAGTT                    |
| <b>Probes</b>           |                                          |
| CircPTPRA-5'Cy3         | AACCAGGAATCCATGCTTATCTGAAGGAGGGAAAGTTTCT |
| miR-636-5'Cy5           | TGCGGGCGGGACGAGCAAGCACA                  |
| U6-5'Cy3                | TTTGCCTGTCATCCTTGCG                      |
| 18S-5'Cy3               | CTTCCTTGGATGTGGTAGCCGTTTC                |
| CircPTPRA-5'biotin      | AACCAGGAATCCATGCTTATCTGAAGGAGGGAAAGTTTCT |
| miR-636-5'biotin        | UGUGCUUGCUCGUCCCCGCCGCA                  |
| miR-636 mutant-5'biotin | UCACGAAGCUCGUCCCCGCCGCA                  |
